# Supplementary material for: Enhanced quantum efficiency and thermal stability by crystal-field engineering in a Y(Ga,Al)3(BO3)4:Cr3+,Yb3+ phosphor for diverse short-wave infrared applications
Source: Royal Society of Chemistry journal article supplement (doi:10.1039/d3tc04702d), 2024-01-01
Supplement: d3tc04702d1.pdf [file d3tc04702d1.pdf]

# Enhanced Quantum Efficiency and Thermal Stability by the Crystal-Field Engineering in $Y(\text{Ga,Al})_3(\text{BO}_3)_4:\text{Cr}^{3+},\text{Yb}^{3+}$ Phosphor for Diverse Short-Wave Infrared Applications

Chenxue Wang<sup>a,b</sup>, Xibao Zhang<sup>a,b</sup>, Chuansheng Zhong<sup>a,b</sup>, Xiudi Wu<sup>a,b</sup>, Yonghui Xu<sup>a,b</sup>, Shuwen Yin<sup>a</sup>, Qingtao Yang<sup>a,b</sup>, Liang Zhou<sup>a,b</sup> \* and Hongpeng You<sup>a,b,c</sup> \*

<sup>a</sup> State Key Laboratory of Rare Earth Resource Utilization, Changchun Institute of Applied Chemistry, Chinese Academy of Sciences, Changchun 130022, P. R. China

<sup>b</sup> University of Science and Technology of China, Hefei 230026, P. R. China

<sup>c</sup> Ganjiang Innovation Academy, Chinese Academy of Sciences, Ganzhou 341000, China

\*Corresponding author. Fax: +86 431 85698041. E-mail address: [zhoul@ciac.ac.cn](mailto:zhoul@ciac.ac.cn) (L. Zhou) and [hpyou@ciac.ac.cn](mailto:hpyou@ciac.ac.cn) (H.P. You).

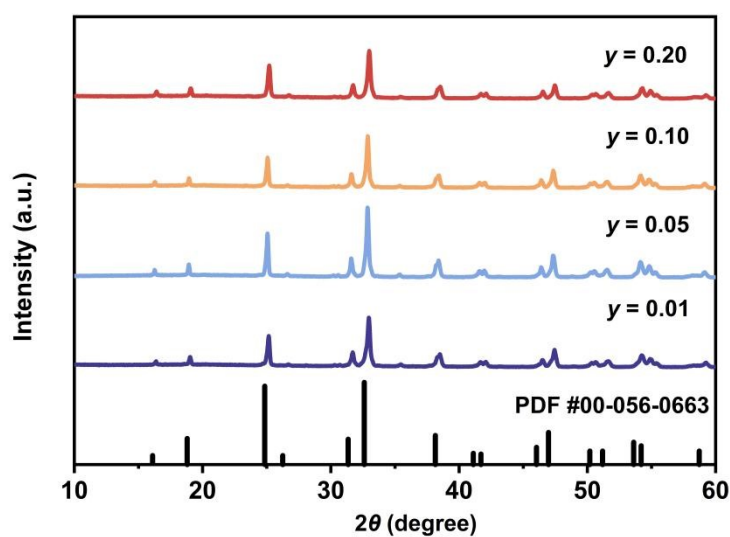

Fig. S1 XRD patterns of YGAB:0.08Cr<sup>3+</sup>,yYb<sup>3+</sup> (y = 0.01, 0.05, 0.10, 0.20).

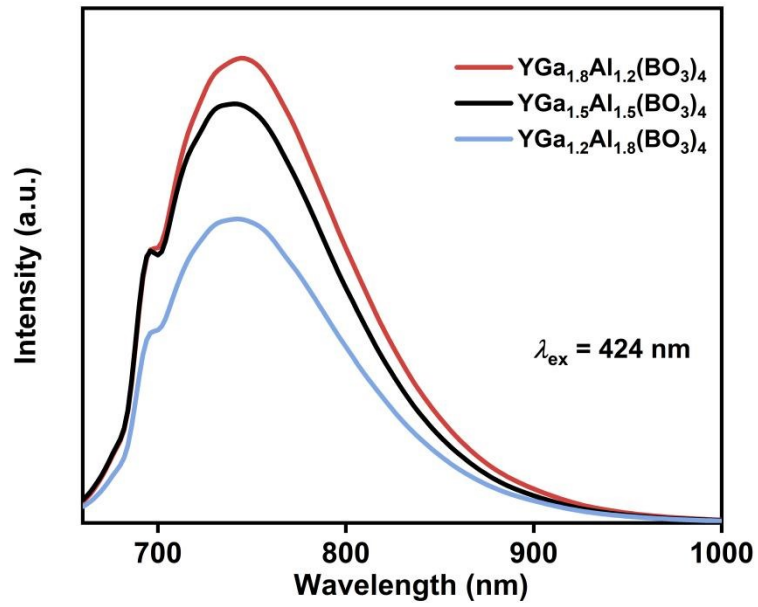

Fig. S2 PL spectra of  $\text{YGa}_{3-z}\text{Al}_z(\text{BO}_3)_4:\text{Cr}^{3+}$  ( $z = 1.2-1.8$ ) at room temperature.

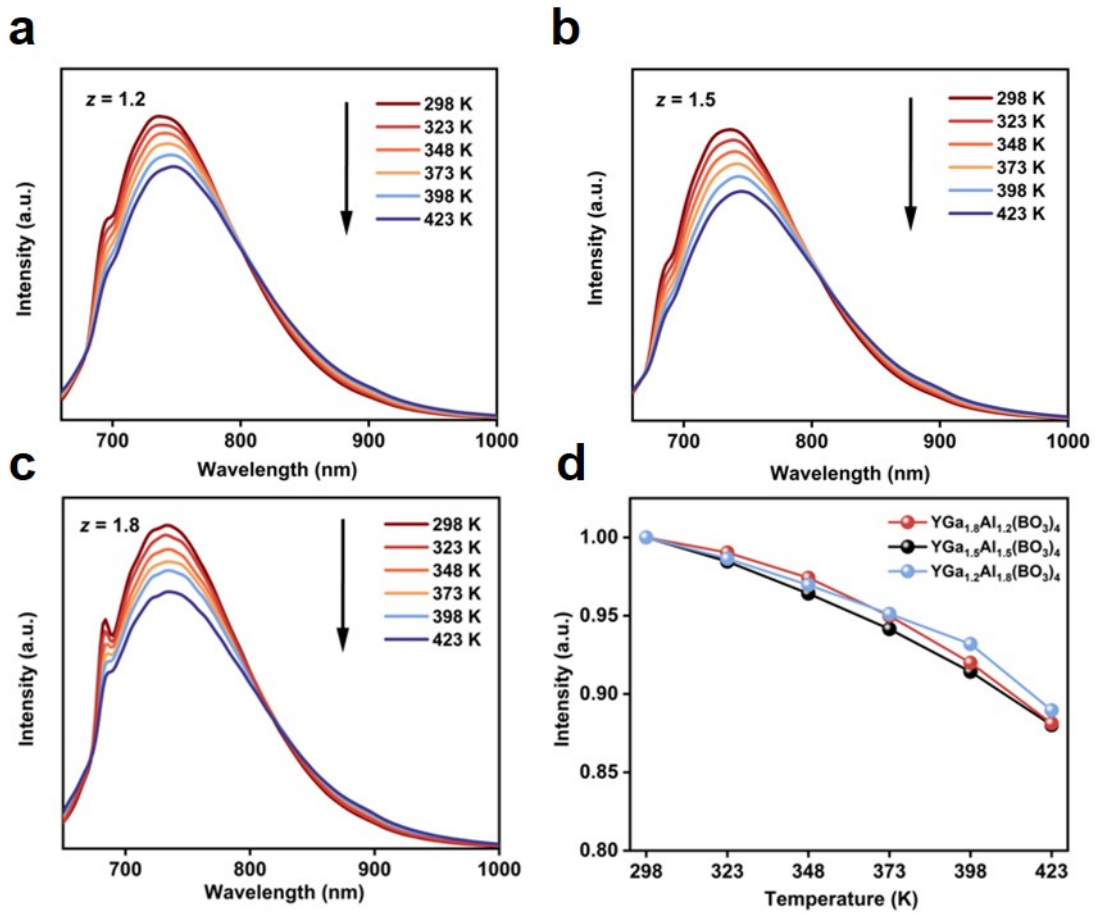

Fig. S3 (a-c) Temperature-dependent emission spectra of  $\text{YGa}_{3-z}\text{Al}_z(\text{BO}_3)_4:\text{Cr}^{3+}$  ( $z = 1.2-1.8$ ). (d) Dependence of the emission intensity on the temperature of the above three samples.

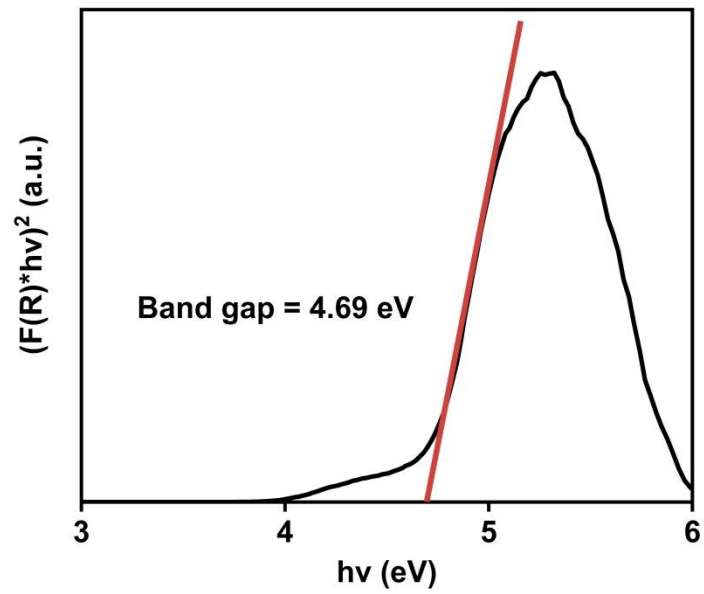

Fig. S4 Tucker curves of the undoped YGAB.

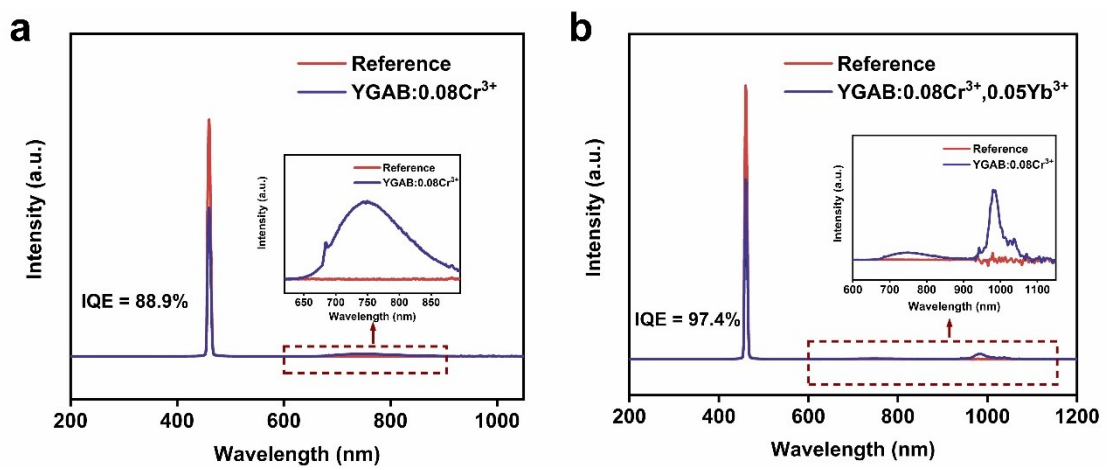

Fig. S5 The quantum efficiency graphs of YGAB:0.08Cr<sup>3+</sup> and YGAB:0.08Cr<sup>3+</sup>,0.05Yb<sup>3+</sup> samples.

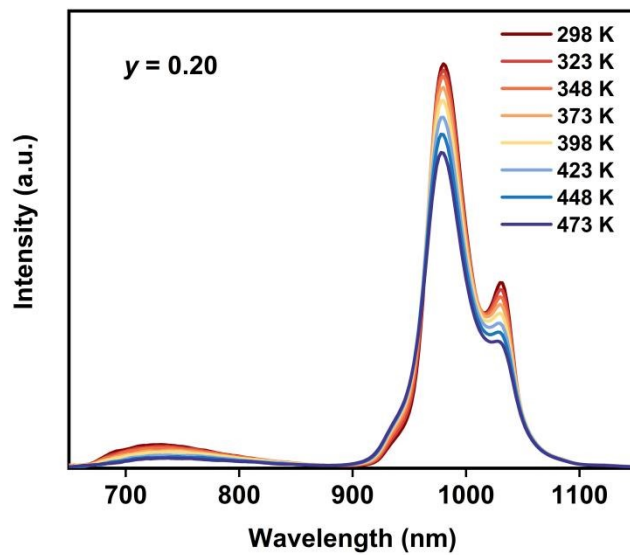

**Fig. S6** Temperature-dependent emission spectra of YGAB:0.08Cr<sup>3+</sup>,0.20Yb<sup>3+</sup>

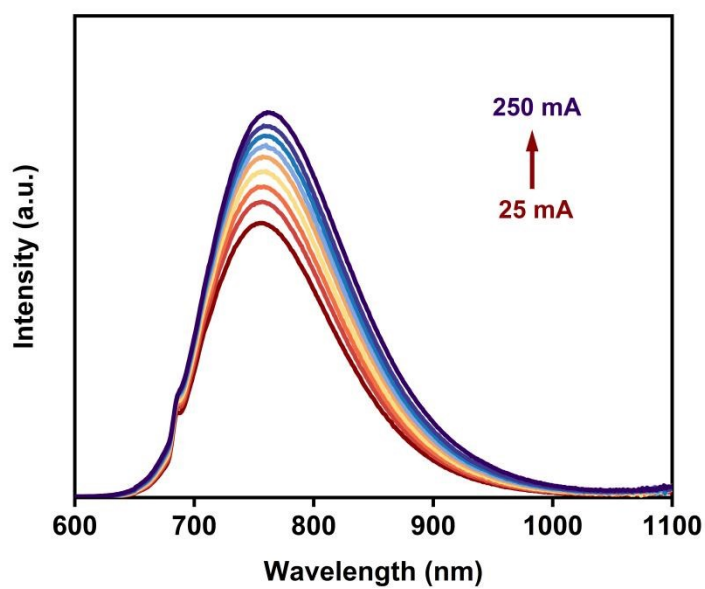

**Fig. S7** Emission spectra of the NIR LED through a combination of YGAB:0.08Cr<sup>3+</sup> with blue LED at varied current over 25–250 mA.

Van Uitert defined  $\theta = 6, 8, 10$  as corresponding to dipole–dipole, dipole–quadrupole, and quadrupole–quadrupole interactions, respectively. As shown in Fig. S8, the slope is -1.35, thus the  $\theta$  is similar to 6 and the multipolar interaction belongs to d-d interaction.

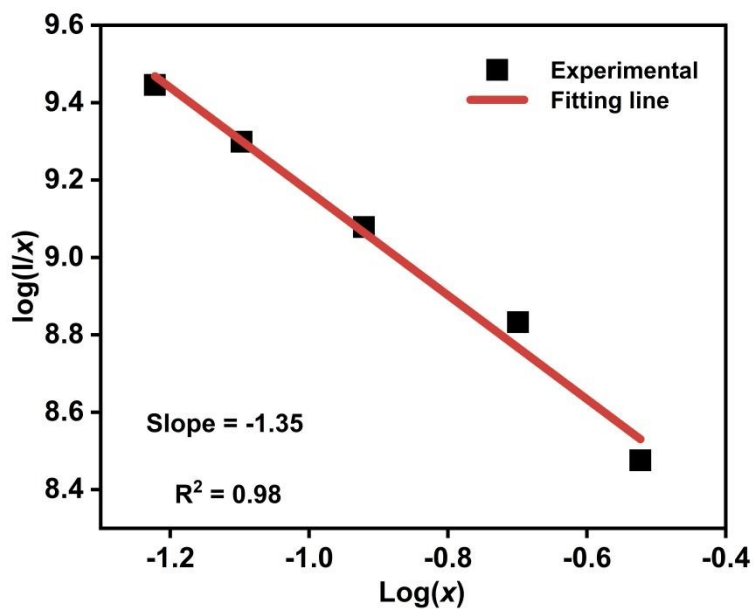

**Fig. S8** Relationship of  $\log(I/x)$  versus  $\log(x)$  in YGAB: $x\text{Cr}^{3+}$  ( $x = 0.04 - 0.40$ ).

**Table S1** Refined structural parameters and cell parameter values of YGAB:0.08Cr<sup>3+</sup> from the Rietveld refinement.

| <b>Formula</b>      | <b>YGa<sub>1.8</sub>Al<sub>1.2</sub>(BO<sub>3</sub>)<sub>4</sub>:Cr<sup>3+</sup></b> |  |  |
|---------------------|--------------------------------------------------------------------------------------|--|--|
| Crystal system      | Rhombohedral                                                                         |  |  |
| Space group         | R32                                                                                  |  |  |
| Cell parameters     | a = 9.3808 Å, b = 9.3808 Å, c = 7.3746 Å<br>Alpha = 90    Beta = 90    Gamma = 120   |  |  |
| Cell volume         | 562.011 Å <sup>3</sup>                                                               |  |  |
| Z                   | 3                                                                                    |  |  |
| Reliability factors | R <sub>p</sub> = 7.9%, R <sub>wp</sub> = 5.98%                                       |  |  |

  

| <b>Atom</b> | <b>x</b> | <b>y</b> | <b>z</b> |
|-------------|----------|----------|----------|
| Y1          | 0.000000 | 0.000000 | 0.500000 |
| Ga1         | 0.447916 | 0.000000 | 0.500000 |
| Al1         | 0.447916 | 0.000000 | 0.500000 |
| B1          | 0.553623 | 0.000000 | 0.000000 |
| B2          | 0.000000 | 0.000000 | 0.000000 |
| O1          | 0.215407 | 0.187235 | 0.316716 |
| O2          | 0.145575 | 0.000000 | 0.000000 |
| O3          | 0.412089 | 0.000000 | 0.000000 |
